1 ***In situ* abundance and carbon fixation activity of distinct anoxygenic phototrophs in the**  
2 **stratified seawater lake Rogoznica**

3  
4 Petra Pjevac<sup>1,2,\*</sup>, Stefan Dyksma<sup>1</sup>, Tobias Goldhammer<sup>3,4</sup>, Izabela Mujakić<sup>5</sup>, Michal  
5 Koblížek<sup>5</sup>, Marc Mussmann<sup>1,2</sup>, Rudolf Amann<sup>1</sup>, Sandi Orlić<sup>6,7\*</sup>

6  
7 <sup>1</sup>Department of Molecular Ecology, Max Planck Institute for Marine Microbiology, Bremen,  
8 Germany

9 <sup>2</sup>University of Vienna, Center for Microbiology and Environmental Systems Science, Division  
10 of Microbial Ecology, Vienna, Austria

11 <sup>3</sup>MARUM Center for Marine Environmental Sciences, Bremen, Germany

12 <sup>4</sup>Department of Chemical Analytics and Biogeochemistry, Leibniz Institute for Freshwater  
13 Ecology and Inland Fisheries, Berlin, Germany

14 <sup>5</sup>Institute of Microbiology CAS, Center Algatech, Třeboň, Czech Republic

15 <sup>6</sup>Ruđer Bošković Institute, Zagreb, Croatia

16 <sup>7</sup>Center of Excellence for Science and Technology Integrating Mediterranean Region,  
17 Microbial Ecology, Zagreb, Croatia

18  
19 \*Address correspondence to: Petra Pjevac, University of Vienna, Center for Microbiology and  
20 Environmental Systems Science, Division of Microbial Ecology, Vienna, Austria,  
21 [pjevac@microbial-ecology.net](mailto:pjevac@microbial-ecology.net); Sandi Orlić, Ruđer Bošković Institute, Zagreb, Croatia,  
22 [sandi.orlic@irb.hr](mailto:sandi.orlic@irb.hr).

23 **Running title:** CO<sub>2</sub> fixation by anoxygenic phototrophs in a saline lake

24 **Keywords:** green sulfur bacteria, purple sulfur bacteria, carbon fixation, flow cytometry, <sup>14</sup>C

25 **Abstract**

26 Sulfide-driven anoxygenic photosynthesis is an ancient microbial metabolism that contributes  
27 significantly to inorganic carbon fixation in stratified, sulfidic water bodies. Methods  
28 commonly applied to quantify inorganic carbon fixation by anoxygenic phototrophs, however,  
29 cannot resolve the contributions of distinct microbial populations to the overall process. We  
30 implemented a straightforward workflow, consisting of radioisotope labeling and flow  
31 cytometric cell sorting based on the distinct autofluorescence of bacterial photo pigments, to  
32 discriminate and quantify contributions of co-occurring anoxygenic phototrophic populations  
33 to *in situ* inorganic carbon fixation in environmental samples. This allowed us to assign  $89.3$   
34  $\pm 7.6\%$  of daytime inorganic carbon fixation by anoxygenic phototrophs in Lake Rogoznica  
35 (Croatia) to an abundant chemocline-dwelling population of green sulfur bacteria (dominated  
36 by *Chlorobium phaeobacteroides*), whereas the co-occurring purple sulfur bacteria  
37 (*Halochromatium* sp.) contributed only  $1.8 \pm 1.4\%$ . Furthermore, we obtained two metagenome  
38 assembled genomes of green sulfur bacteria and one of a purple sulfur bacterium which  
39 provides the first genomic insights into the genus *Halochromatium*, confirming its high  
40 metabolic flexibility and physiological potential for mixo- and heterotrophic growth.

## 41 **Introduction**

42 Modern anoxic phototrophic ecosystems are often seen as analogs to study the ecology of early  
43 Earth environments. Sulfide-driven, anoxygenic photosynthesis is an ancient bacterial energy-  
44 yielding metabolism (Brocks et al., 2005) and often dominates autotrophic carbon fixation in  
45 stratified, sulfidic environments (e.g. Cohen et al., 1977). This process is primarily mediated  
46 by two phylogenetically distinct groups of bacteria: i) the strictly anaerobic green sulfur  
47 bacteria (GSB) of the class *Chlorobia* (Overmann, 2006), and ii) the metabolically more  
48 versatile purple sulfur bacteria (PSB) affiliated with the gammaproteobacterial orders  
49 *Chromatiales* and *Ectothiorhodospirales* (Imhoff, 2006a, 2006b). GSB and PSB oxidize and  
50 thereby detoxify sulfide and other reduced sulfur compounds, primarily formed during sulfate-  
51 dependent mineralization of organic matter in anoxic waters and sediments of marine and  
52 limnic environments (Overmann and Garcia-Pichel, 2013). Although GSB and PSB basically  
53 compete for the same resources, they co-occur in most photic and sulfidic environments.  
54 Ecological niche partitioning between GSB and PSB is considered to be mainly based on  
55 sulfide and oxygen concentrations, and light availability (Abella et al., 1980; Mas and van  
56 Gemerden, 1995; Stomp et al., 2007). PSB require more light and typically form dense  
57 populations at the sulfide-oxygen interface, while low-light adapted GSB often thrive beneath  
58 the PSB layer (e.g. Musat et al., 2008; Llorens-Marès et al., 2015). While GSB are strictly  
59 photoautotrophic, some PSB are capable of mixo- or heterotrophic, and chemotrophic growth  
60 (e.g. Imhoff, 2006a, 2006b; Berg et al., 2019), which further facilitates niche partitioning.  
61 Numerous studies have addressed the overall contribution of anoxygenic photosynthesis (by  
62 GSB and PSB) to *in situ* dissolved inorganic carbon (DIC) fixation in sulfidic, stratified aquatic  
63 environments (e.g. Camacho et al., 2001; Casamayor et al., 2001; Marschall et al., 2010; Fontes  
64 et al., 2011; Morana et al., 2016). However, only few studies have investigated the relative  
65 contributions of GSB and PSB populations to this process. Musat and colleagues (2008)  
66 applied nanoscale secondary ion mass spectrometry (nanoSIMS) to track uptake of  $^{13}\text{C}$ -

67 bicarbonate and  $^{15}\text{N}$ -ammonia in single cells of GSB and PSB from the chemocline of Lake  
68 Cadagno. They reported that relative abundances of PSB and GSB do not correlate with their  
69 DIC fixation activity. Instead, the contribution of a rare PSB population (*Chromatium okenii*)  
70 to total DIC fixation was disproportionately high. In fact, per cell DIC fixation rates in *Chr.*  
71 *okenii* were up to three orders of magnitude higher than per cell DIC fixation rates of the *in*  
72 *situ* dominant GSB *Chlorobium clathratiforme*. In another study at Lake Cadagno, Storelli and  
73 colleagues (2013) incubated pure cultures of PSB and GSB isolated from Lake Cadagno *in situ*  
74 with  $^{14}\text{C}$ -labeled bicarbonate and quantified their contribution to DIC fixation by  
75 scintillographic quantification of radioisotope incorporation into microbial biomass. Again, a  
76 disproportionately high rate of DIC fixation in cells of *in situ* rare PSBs (*Candidatus Thiocystis*  
77 *syntrophicum* and *Lamprocystis purpurea*) was observed, while DIC fixation by the *in situ*  
78 dominant GSB *Chl. clathratiforme* was only marginal. However, these studies were somewhat  
79 limited by incubations performed *ex situ* or use of pure cultures that did not necessarily  
80 represent the *in situ* PSB and GSB communities. Thus, it is still unknown whether rare  
81 populations of PSB in general account for high proportions of DIC fixation via anoxygenic  
82 photosynthesis, or if this phenomenon is specific to Lake Cadagno.

83 Here, we present an approach combining incubations with radioisotope-labeled bicarbonate,  
84 fluorescence activated cell sorting (FACS) and scintillography of the sorted populations to  
85 discriminate the contribution of environmental populations of PSB and GSB to *in situ* DIC  
86 fixation. Similar approaches have previously been used to quantify the activities of discrete  
87 microbial populations in both pelagic and benthic environments (e.g. Zubkov et al., 2003; Vila-  
88 Costa et al., 2006; Dykstra et al., 2016). These high throughput workflows enable researches  
89 to directly measure the relative contribution of individual microbial groups to an overall  
90 process, without relying on assumptions such as conversion factors. Using this approach, we  
91 were able to show that the *in situ* numerically dominant GSB also dominate DIC fixation in  
92 our model system - a stratified seawater lake (Lake Rogoznica) on the eastern Adriatic coast

93 (Croatia). The *in situ* rare PSB, on the other hand, contributed only marginally to DIC fixation  
94 in Lake Rogoznica. The metagenome assembled genome of these PSB, representing the first  
95 genomic dataset for the genus *Halochromatium*, illustrates their capability of mixo- and  
96 heterotrophic growth.

97

## 98 **Results and Discussion**

### 99 *Chemical and hydrographical settings*

100 Lake Rogoznica is a monomictic (stratified, except for one annual mixing) seawater lake on  
101 the eastern Adriatic coast (Fig. S1). At the time of sampling and experimentation (April, 2015),  
102 the water column of Lake Rogoznica was stratified. The recorded chemical and hydrographical  
103 water profiles were in accordance with data collected on numerous occasions in spring time  
104 over the last three decades (e.g. Bura-Nakić et al., 2009; Pjevac et al., 2015). The salinity of  
105 the deeper water layers was similar to the surrounding Adriatic seawater source (Lipizer et al.,  
106 2014). The decreased salinity in the top 4 m of the epilimnion (Fig. 1A) was caused by rainfalls  
107 during the weeks preceding sampling, since atmospheric precipitation is the only freshwater  
108 source to Lake Rogoznica (Žic et al., 2013). Oxygen saturation was at or above 100% in the  
109 top 4 m of the epilimnion and steadily decreased until depletion at ~9 m (Fig. 1A). The  
110 chemocline, a sulfide-oxygen interface, was located at 8.5-9 m depth and accompanied by a  
111 sharp peak in turbidity (Fig. 1B), indicative of a dense microbial population and the formation  
112 of colloidal zero-valent sulfur ( $S^0$ ; Kamyshny et al., 2011).  $S^0$  was detected at 8, 9 and 10 m  
113 depth, with a concentration peak of  $77 \mu\text{mol l}^{-1}$  at 9 m (Fig. 1C). Thiosulfate and sulfide were  
114 only detected below 8 m, and reached maximal concentrations of  $12 \mu\text{mol l}^{-1}$  and  $2.7 \text{mmol l}^{-1}$ , respectively (Fig. 1C). DIC concentrations in Lake Rogoznica steadily increased with depth  
115 and ranged between  $3.4\text{-}5.6 \text{mmol l}^{-1}$  (Fig. 1C). These values are at least  $1 \text{mmol l}^{-1}$  higher than  
116 measured and modeled DIC concentrations in Adriatic surface seawater (e.g. Cossarini et al.,  
117 2015; Gemayel et al., 2015). Carbonate mineral (calcite and dolomite) dissolution could have  
118

119 been an important DIC source in Lake Rogoznica, as it has been previously reported for other  
120 karst and epikarst hosted surface water bodies and aquifers in Croatia and elsewhere (e.g.  
121 Barešić et al., 2011; Florea et al., 2016). Alternatively, organic matter (OM) mineralization in  
122 the lake sediment and anoxic water column could have resulted in DIC build-up during water  
123 column stratification.

124

#### 125 *Photosynthetic pigment analysis*

126 During stratification, Lake Rogoznica contains a high biomass of anoxygenic photosynthetic  
127 bacteria in anoxic waters, while oxygenic phototrophs (i.e. cyanobacteria and algae) inhabit the  
128 oxic epilimnion (Malešević et al., 2015; Pjevac et al., 2015). To assess the depth distribution  
129 of phototrophic microorganisms, we analyzed the photosynthetic pigment content of a lake  
130 water depth profile collected on the day of experimentation. In the upper 8 m of the water  
131 column we detected mostly Chl *a*, indicative of the presence of cyanobacteria and algae  
132 (oxygenic phototrophs; Scheer, 2006). Chl *a* reached a maximum of 5.0 nmol l<sup>-1</sup> at 4 m depth,  
133 with a secondary peak (4.1 nmol l<sup>-1</sup>) at 8 m depth (Fig. 2). No Chl *a* was detected in samples  
134 collected from 9 m and 10 m depth (Fig. 2). In the epilimnion (0-8 m), small amounts of BChl  
135 *a* (<5% of identified pigments), likely originating from aerobic anoxygenic species, were  
136 detected (Fig. 2). The water samples collected at the chemocline (9 m) and in the hypolimnion  
137 (10 m) contained 80- to 110-fold higher concentrations of BChl *a* (11.1-14.5 nmol l<sup>-1</sup>) than the  
138 epilimnion, reflecting the presence of GSB, PSB, and potentially other anoxygenic  
139 photosynthetic bacteria (Scheer, 2006). No BChl *b*, *c* or *d* were detected. However, at the  
140 chemocline (9 m) and in the hypolimnion (10 m), very high concentrations of BChl *e* (8.1-18.4  
141 nmol l<sup>-1</sup>), only known for low-light adapted, brown-colored GSB (Chew and Bryant, 2007),  
142 were detected (Fig. 2). Interestingly, even above the anoxic chemocline (at 8 m), BChl *e*  
143 concentrations (0.5 nmol l<sup>-1</sup>) exceeded BChl *a* concentrations (0.1 nmol l<sup>-1</sup>). Since BChl *e* is  
144 only found in GSB, while BChl *a* is present in a variety of anoxygenic phototrophic bacteria,

145 the BChl *e* / BChl *a* ratio supports the previously reported dominance of GSB throughout the  
146 chemocline of Lake Rogoznica (Pjevac et al., 2015).

147

#### 148 *GSB and PSB in Lake Rogoznica*

149 To determine the community composition of anoxygenic phototrophic bacteria in Lake  
150 Rogoznica, we sequenced metagenomes from chemocline (9 m) and hypolimnion (10 m)  
151 samples and assessed to relative abundance of GSB and PSB in these samples via 16S rRNA  
152 gene sequence read mapping and reconstruction (Fig. S2). In the chemocline (9 m), GSB-  
153 related reads accounted for 13% of the total reads mapped to 16S rRNA genes, while PSB-  
154 related reads accounted for 5%. In the hypolimnion (10 m) sample, the relative contribution of  
155 GSB- and PSB-related reads mapped to 16S rRNA gene sequences were 17% and 2%,  
156 respectively (Fig. S2).

157 From the metagenomic data, we reconstructed three nearly complete high quality metagenome  
158 assembled genomes (HQ MAGs) related to anoxygenic phototrophs (Table 1). Two GSB-  
159 related HQ MAGs displayed a high average nucleotide identity (>98%) to genomes of validly  
160 described *Chlorobiaceae* species (Fig. S3; Table 1). The more abundant GSB in Lake  
161 Rogoznica, represented by HQ MAG C10 (Table 1), was identified as a strain of *Chlorobium*  
162 *phaeobacteroides* (Overmann et al., 1992). This is well in line with the high concentration of  
163 BChl *e* measured in chemocline and hypolimnion samples, as BChl *e* is the dominant  
164 photosynthetic pigment in the low light adapted *Chlorobium phaeobacteroides* strain BS1  
165 (Overmann et al., 1992). The second GSB HQ MAG, B10, was closely related to  
166 *Prosthecochloris aestuarii* DSM 271 (Gorlenko, 1970), and represents a strain of this species.  
167 Based on read coverage, it was present at a much lower abundance at the time of sampling (Fig.  
168 S4). The genomic potential of both HQ MAGs from GSB overlapped with the genomic  
169 potential of their close relatives isolated in pure culture: both HQ MAGs show the genomic  
170 potential of an obligatory anoxygenic photolithoautotroph.

171 For the PSB-related HQ MAG A10 no closely related genome sequence could be identified.  
172 However, the two almost identical (1 nucleotide difference) 16S rRNA gene copies encoded in  
173 HQ MAG A10 displayed 99% sequence identity to the 16S rRNA gene sequence of  
174 *Halochromatium roseum* (Kumar et al., 2007) and the 16S rRNA gene sequence of the PSB  
175 species isolated by FACS from Lake Rogoznica in our previous study (Pjevac et al., 2015; Fig.  
176 S5). Thus, MAG A10 provides the first genomic insights into the genus *Halochromatium*  
177 within the family *Chromatiaceae*. The high 16S rRNA sequence identity of 99% is in the  
178 absence of a genome sequence suggestive, yet insufficient for the assignment of this MAG to  
179 *Halochromatium roseum*.

180 All three validly described *Halochromatium* species - *Halochromatium salexigens* (Caumette  
181 et al., 1988), *Halochromatium glycolicum* (Caumette et al., 1997), and *Halochromatium*  
182 *roseum* (Kumar et al., 2007) harbor BChl *a* as their main photosynthetic pigment. They require  
183 elevated NaCl concentrations (>1%) and grow photolithoautotrophically by oxidation of  
184 reduced sulfur compounds. Additionally, the capability to assimilate at least some organic  
185 carbon compounds (e.g. acetate, pyruvate, fumarate, succinate, malate, glycolate) during mixo-  
186 or heterotrophic growth was demonstrated for all strains. Furthermore, sulfur-dependent  
187 chemolithotrophic growth (both autotrophic and heterotrophic) under microaerobic conditions  
188 has been demonstrated for *Halochromatium salexigens* and *Halochromatium glycolicum*  
189 (Caumette et al., 1988; Caumette et al., 1997; Kumar et al., 2007). In accordance, the here  
190 retrieved *Halochromatium* sp. HQ MAG A10 encodes the potential for lithotrophic growth via  
191 reduced sulfur compound oxidation and CO<sub>2</sub> fixation via the Calvin-Benson-Bassham cycle.

192 All genes essential for phototrophic growth and chemotrophic growth with O<sub>2</sub> as terminal  
193 electron acceptor were present (Fig. 3). Moreover, this HQ MAG encodes the capability for N<sub>2</sub>  
194 fixation and urea utilization (Fig. 4) - metabolic features that were not previously reported for  
195 members of the genus *Halochromatium*. Finally, the HQ MAG A10 encodes genes for mixo-



196 or heterotrophic metabolism, including glycolate and sucrose utilization, as well as glycogen,  
197 polyphosphate, and PHB storage and utilization (Fig. 4).

198

### 199 *FACS sorting and quantification of GSB and PSB populations*

200 To assess the contribution of PSB and GSB to DIC fixation in Lake Rogoznica, we  
201 implemented a FACS-based workflow to differentially sort the GSB and PSB populations after  
202 *in situ* incubations with radioisotope labeled bicarbonate. Briefly, after sorting and  
203 quantification of total microbial cells based on an unspecific DNA stain, the red fluorescence  
204 (FL3) of photosynthetic pigments upon excitation with green laser light (488 nm) is used as a  
205 diagnostic feature to distinguish phototrophs from other microorganisms. To further  
206 distinguish different pigmented populations, both forward scatter (FSC) profiles (reflecting  
207 differences in cell size) and 90° side scatter (SSC) profiles (reflecting cell granularity) can be  
208 used. In fact, combinations of FL3, FSC and SSC profiles have previously been used to  
209 distinguish PSB and GSB from each other and other microorganisms in cultures and  
210 environmental samples (Casamayor et al., 2007; Pjevac et al., 2015; Zimmermann et al., 2015).  
211 Here, we opted for identification, sorting and quantification of GSB and PSB populations based  
212 on FL3 versus SSC profiles, as this yielded the clearest distinction between populations (Fig.  
213 4).

214 In the chemocline samples, we detected a low abundance ( $1.0 \pm 1.0\%$  of all cells) population  
215 displaying a FL3 vs. SSC profile resembling that of the PSB previously selectively sorted from  
216 Lake Rogoznica (Pjevac et al., 2015). Another, significantly more abundant ( $18.4 \pm 1.4\%$ )  
217 population was identified on FL3 vs. SSC profiles in the chemocline (9 m) samples (Fig. 4).  
218 Taking in account the absence of oxygenic phototrophs at and below the chemocline and the  
219 matching relative abundance of GSB in chemocline samples (Fig. S2), we identified this  
220 population as GSB (Fig. 4). In the hypolimnion sample (10 m), the abundance of the PSB was  
221 too low for sorting, while the GSB accounted for  $19.7 \pm 6.4\%$  of all cells (Fig. 4).

222

223 *DIC fixation by anoxygenic phototrophic bacteria in Lake Rogoznica*

224 Previous studies, performed in other aquatic stratified environments, combined *in situ*  
225 incubations with isotopically labeled bicarbonate with incubations in the dark or in the presence  
226 of oxygenic photosynthesis inhibitors (e.g. 3-(3',4'-dichlorophenyl)-1,1'-dimethyl urea -  
227 DCMU) to distinguish DIC fixation by anoxygenic phototrophs, oxygenic phototrophs and  
228 chemolithoautotrophs (e.g. Camacho et al., 2001; Casamayor et al., 2001; García-Cantizano et  
229 al., 2005; Marschall et al., 2010; Fontes et al., 2011; Morana et al., 2016). Our approach, on  
230 the other hand, requires only *in situ* <sup>14</sup>C-bicarbonate incubations followed by FACS and  
231 scintillography to quantify the contributions of individual anoxygenic phototrophic populations  
232 to DIC fixation. Using this method, cell specific rates of *in situ* DIC fixation were determined  
233 by scintillography for total cell sorts (i.e. all SYBR Green-I stained cells), as well as GSB and  
234 PSB specific cell sorts (i.e. subpopulations of all SYBR Green-I stained cells differentially  
235 based on their FL3 vs. SSC profile).

236 Average *in situ* per cell DIC fixation rates were similar in epilimnion ( $15.1 \pm 6.0$  amol C cell<sup>-1</sup>  
237 h<sup>-1</sup>) and chemocline ( $12.4 \pm 2.8$  amol C cell<sup>-1</sup> h<sup>-1</sup>) samples, while average *in situ* per cell DIC  
238 fixation rates in hypolimnion samples ( $1.2 \pm 1.2$  amol C cell<sup>-1</sup> h<sup>-1</sup>) were not higher than the  
239 background signal measured in dead controls ( $0.7 \pm 0.1$  amol C cell<sup>-1</sup> h<sup>-1</sup>) (Fig. 5). Average *in*  
240 *situ* per cell DIC fixation rates of the chemocline-dwelling GSB population from Lake  
241 Rogoznica ( $60.4 \pm 14.7$  amol C cell<sup>-1</sup> h<sup>-1</sup>; Fig. 5) were in a similar range to rates calculated for  
242 the *Chl. clathratiforme* (GSB) cells from Lake Cadagno (Musat et al., 2008). The average *in*  
243 *situ* per cell DIC fixation rates of the chemocline-dwelling PSB population ( $27.1 \pm 11.1$  amol  
244 C cell<sup>-1</sup> h<sup>-1</sup>; Fig. 5) were in the same order of magnitude as rates determined for chemocline-  
245 dwelling GSB in this and other studies (Musat et al., 2008; Storelli et al., 2013). However,  
246 these values are up to three orders of magnitude lower than rates determined for PSB  
247 populations in Lake Cadagno (Musat et al., 2008; Storelli et al., 2013). Notably, DIC fixation

248 rates of the multiple, co-occurring PSB populations in Lake Cadagno also varied by up to 100-  
249 fold (Musat et al., 2008; Storelli et al., 2013).

250 By integrating average cell abundances with average *in situ* per cell DIC fixation rates, we  
251 determined that the chemocline-dwelling GSB population was responsible for almost the entire  
252 (89.3 ±7.6%) *in situ* DIC fixation measured in this study, whereas the low abundant PSB  
253 population contributed only 1.8 ±1.4%. This is in contrast to the disproportionately high  
254 contribution of PSB to *in situ* DIC fixation reported for the chemocline of Lake Cadagno  
255 (Musat et al., 2008; Storelli et al., 2013).

256 Finally, the hypolimnion-dwelling GSB population (2.1 ±1.1 amol C cell<sup>-1</sup> h<sup>-1</sup>) in Lake  
257 Rogoznica did not assimilate significant amounts of labeled DIC (Fig. 5). This result is  
258 consistent with previously observed low DIC uptake by anoxygenic phototrophs in the  
259 hypolimnion (e.g. Guerrero et al., 1985; Camacho and Vicente 1998) and can be attributed to  
260 low light quality through self-shading.

261

## 262 *Conclusions*

263 We show that anoxygenic photosynthesis-driven DIC fixation in Lake Rogoznica in spring  
264 2015 was primarily mediated by a highly abundant chemocline-dwelling GSB population,  
265 whereas the co-occurring PSB contributed only marginally to DIC fixation. Our radioisotope-  
266 labeling and FACS-based workflow facilitated unprecedented insights into DIC fixation by  
267 environmental populations of anoxygenic phototrophs. Our results contrast previous findings  
268 from Lake Cadagno and illustrate that high contributions of rare PSB populations to DIC  
269 fixations cannot be generalized for other stratified lakes. Further research is needed to obtain a  
270 more representative and comprehensive picture of PSB vs. GSB mediated DIC fixation in  
271 environments inhibited by anoxygenic phototrophs. Furthermore, the here presented workflow  
272 can be readily adapted for analyze various co-occurring phototrophic microbial populations,  
273 and also used to investigate other aspects of the *in situ* metabolism of physiologically flexible

274 PSB. For example, photoheterotrophic activity, a prominent metabolic feature encoded in the  
275 here recovered *Halochromatium* MAG and other PSB genomes (Berg et al., 2019; Luedin et  
276 al., 2019), could be quantified by tracking the incorporation of radiolabeled organic substrates  
277 into environmental PSB populations.

278

## 279 **Experimental procedures**

### 280 *Study site and sample collection*

281 Lake Rogoznica (Fig. S1) is a small (~1 ha, 15 m max depth) seawater lake on the Dalmatian  
282 peninsula Gradina, Croatia (43°32'N, 15°58'E). It is located at approximately 100 m distance  
283 from the seashore, exchanging water with the Adriatic Sea through subsurface channels in the  
284 porous limestone characteristic to Croatian coastal areas (e.g. Žic et al., 2013). The lake water  
285 is rich in nutrients and dissolved organic carbon (DOC). The hypolimnion is highly sulfidic  
286 during stratification (Pjevac et al., 2015). On April 2<sup>nd</sup>, 2015 hydrographical parameters  
287 (dissolved oxygen concentration [O<sub>2</sub>], temperature [T], conductivity [Sm], turbidity [t] and pH)  
288 of a vertical lake profile were recorded with a Hydrolab DS5 multiparameter water quality  
289 probe (OTT Hydromet, Germany). Water samples for DIC and reduced sulfur species (RSS)  
290 analyses were collected with a vertically lowered 5-liter Niskin bottle (General Oceanics, USA)  
291 in 1 meter intervals between the surface [~10-60 cm] and 10 m water depth. At 7 m  
292 (epilimnion), 9 m (chemocline) and 10 m (hypolimnion) below surface, larger sample volumes  
293 were collected for activity incubations and metagenome sequencing.

294

### 295 *Sample preservation and chemical analyses*

296 Samples for DIC analyses were collected in 1.5 ml amber borosilicate vials (Zinsser Analytic  
297 Qualyvials); 15 µl saturated mercury chloride solution (2.7 mol l<sup>-1</sup>) were added and vials were  
298 closed with polytetrafluoroethylene (PTFE) coated septa and screw caps. DIC was measured  
299 by infrared spectroscopy (Analytik Jena multi N/C 2100s) as CO<sub>2</sub> liberated from the original

300 sample in a 10% phosphoric acid trap. Samples for reduced sulfur species analyses were  
301 collected in 1.5 ml amber borosilicate vials (Zinsser Analytic Qualyvials) and preserved with  
302  $\text{ZnCl}_2$  (final concentration 4%). Sulfide concentrations were determined  
303 spectrophotometrically in  $\text{ZnCl}_2$  fixed samples as described before (Cline, 1969). Zero-valent  
304 sulfur was converted to thiosulfate via sulfitolysis (Jørgensen et al., 1979; Ferdelman et al.,  
305 1991). Briefly,  $\text{ZnCl}_2$  fixed samples were buffered with HEPES (pH 8) and reacted with a 2%  
306 sulfite solution at 70°C for 12 h to yield thiosulfate. Parallel samples with no added sulfite were  
307 used as a control for background thiosulfate concentrations. The thiosulfate products were then  
308 derivatized with monobromobimane as described in Zopfi et al., (2004). Derivatized samples  
309 were analyzed on an Acquity H-class UPLC system (Waters Corporation, USA) equipped with  
310 an Acquity UPLC BEH C8 column and controlled with the Empower III software. Sample  
311 temperature was maintained at 4°C, column temperature was 40°C, and the sample injection  
312 volume used was 1  $\mu\text{l}$ . The mobile phase consisted of acetic acid (0.25 v/v), pH 3.5 (A), and  
313 100% UPLC-grade methanol (B). The following gradient conditions were used at a constant  
314 flow rate of 0.65  $\text{ml min}^{-1}$ : start, 5% B; 0-4 min, ramp of curve 6 (linear) to 10% B; 4-5 min,  
315 ramp of curve 6 to 95% B; 5-6 min, 95% B; 6.01 min, 5% B; 8 min, 5% B; injection of the next  
316 sample. The fluorescence detector was set to an excitation wavelength of 380 nm and an  
317 emission wavelength of 480 nm.

318

### 319 *Pigment analysis*

320 One l (0-7 m) or 1.5 l (8-10 m) water samples were collected onto 47 mm glass fiber filters  
321 (type GF/F, nominal pore size 0.7  $\mu\text{m}$ ) using low vacuum. The filters were folded, gently dried  
322 using a paper towel, and stored at -80°C. In the laboratory, the filters were homogenized in 7  
323 ml acetone: methanol mixture (7:2) using a glass Teflon tissue homogenizer. The filter debris  
324 was removed by centrifugation (10,000 g). Pure extracts were analyzed using the Prominence-  
325 *i* LC-2030C HPLC system (Shimadzu, Japan). Pigments were separated on a heated (40°C)

326 Luna 3 $\mu$ C8(2) 100 Å column (Phenomenex Inc., USA) with binary solvent system A: 20% 28  
327 mmol l<sup>-1</sup> ammonium acetate + 80% methanol, B: 100% methanol. Chlorophyll (Chl) *a*, BChl  
328 *a*, and BChl *e* were detected at 665 nm, 770 nm, and 655 nm, respectively. The HPLC system  
329 was calibrated using 100% methanol extracts of *Synechocystis* sp. PCC6803, *Rhodobacter*  
330 *sphaeroides* and *Chlorobium phaeobacteroides* with known concentrations of Chl *a*, BChl *a*,  
331 and BChl *e*, respectively.

332

### 333 *DNA extraction and metagenome sequencing*

334 DNA for metagenome sequencing was extracted from 6 polycarbonate membrane filters (type  
335 GTTP; 0.2  $\mu$ m pore size, Whatman, UK) per depth (9 m and 10 m) by a phenol/chloroform-  
336 based protocol (Massana et al., 1997). Briefly, filters were incubated with lysozyme (1 g l<sup>-1</sup>) at  
337 37°C for 45 min, and proteinase K (0.2 g l<sup>-1</sup>) and SDS (1%) at 55°C for 1 h. Extraction was  
338 performed twice with 750  $\mu$ l of phenol: chloroform (CHCl<sub>3</sub>): isoamyl alcohol (IAA) (25 : 24 :  
339 1, pH 8) solution and once with 750  $\mu$ l of CHCl<sub>3</sub> : IAA (24 : 1) solution. The aqueous phases  
340 of all extractions for each depth were collected and pooled. Finally, 1/10 volume of sodium  
341 acetate was added to the pooled aqueous phase and DNA was precipitated for 30 min at -20°C  
342 with 1 ml of isopropanol. After a centrifugation step (20 min at 4°C and 20,000 g) the DNA  
343 pellet was washed with 500  $\mu$ l of 70% ethanol. After a second centrifugation step (5 min at 4°C  
344 and 20,000 g) the pellet was dissolved in 80  $\mu$ l of deionized (MQ) water and stored at -20°C  
345 until further processing. Aliquots of the DNA extracts were sent to the Max Planck Genome  
346 Centre (MP-GC, Cologne) for paired end library preparation and metagenome sequencing on  
347 the Illumina HiSeq 2500. Paired end metagenome reads were quality trimmed at a phred score  
348 of 15 using the bbdduk function of the BBMap package (v. 35.82;  
349 <https://sourceforge.net/projects/bbmap/>). Small subunit (SSU) rRNA gene sequences were  
350 reconstructed from the quality trimmed metagenomic reads and classified against the SILVA  
351 SSU rRNA gene database using PhyloFlash (v.3.0; Gruber-Vodicka et al., 2019). A

352 metagenome co-assembly of both samples was performed with Spades v. 3.11.1 (Bankevich et  
353 al., 2012) and binned with Metwatt v. 3.5.3 (Strous et al., 2012). Three HQ MAGs classified  
354 as anoxygenic phototrophs were identified and polished by iterative re-assembly for 10  
355 iterations as described in Mußmann et al., 2017. The phylogenetic affiliation, completeness  
356 and redundancy of the HQ MAGs was assessed with MIGA (Rodriguez-R et al., 2018) and the  
357 HQ MAGs were automatically annotated in RAST (Aziz et al., 2008). For phylogenetic  
358 placement of the *Halochromatium* sp. A10 HQ MAG, the 16S rRNA gene sequences encoded  
359 in HQ MAG A10, alongside with a selection of 16S rRNA gene sequences from  
360 *Chromatiaceae* isolates and environmental samples were aligned against the SILVA r132 SSU  
361 database using the SINA aligner (Pruesse et al., 2012). The alignment was uploaded to the IQ-  
362 TREE webserver (Trifinopoulos et al., 2016) for phylogenetic tree reconstruction using default  
363 parameters, and the resulting tree was visualized in iTOL (Letunic and Bork, 2016).

364

#### 365 *Nucleotide Accession Numbers*

366 Metagenome assembled genomes (MAGs) are available under NCBI genome  
367 accessions/RAST project IDs POWB00000000/2049430.3 (*Halochromatium* sp. A10),  
368 POWC00000000/290513.3 (*Prosthecochloris* sp. B10) and POWD00000000/290513.4  
369 (*Chlorobium* sp. C10), respectively, while the metagenome raw reads can be retrieved from  
370 ENA under the study accession number PRJEB26778.

371

#### 372 *Carbon assimilation experiments*

373 Samples for *in situ* <sup>14</sup>C-bicarbonate assimilation experiments were collected with a 5-liter  
374 Niskin bottle at 7 m, 9 m and 10 m water depth as described above. Sample aliquots were  
375 transferred to 6 ml exetainer screw cap vials (Labco Limited) directly from the Niskin bottles.  
376 A sterile rubber tube and a slow flow rate were used during transfer to avoid oxygen intrusion  
377 to anoxic chemocline and hypolimnion samples. Four exetainer vials were overflowed and filled

378 at each depth. From one exetainer per depth, 325  $\mu\text{l}$  sample were removed with a syringe  
379 through the screw cap septum, and replaced with 325  $\mu\text{l}$  37% formaldehyde solution, resulting  
380 in a final formaldehyde concentration of 2%. Thereafter, 0.10  $\text{mmol l}^{-1}$  (7 m), 0.12  $\text{mmol l}^{-1}$  (9  
381 m) or 0.15  $\text{mmol l}^{-1}$  (10 m)  $^{14}\text{C}$ -labeled sodium bicarbonate (specific activity 56  $\text{mCi mmol}^{-1}$ )  
382 was added to all 4 exetainers of each depth sample with a glass syringe. The sample-filled  
383 exetainers were mounted vertical to carrier rings, and lowered to *in situ* depths of 7 m, 9 m or  
384 10 m, respectively. Incubations were performed at ambient light and temperature conditions  
385 between 8 am and 2 pm, to assure light availability for phototrophic activity. After 6 h of  
386 incubation samples were retrieved, fixed with 2% formaldehyde (final concentration) as  
387 described above, and kept at 4°C until further processing.

388

#### 389 *FACS and scintillation counting of sorted cells*

390 Prior to flow cytometry, cells were stained with SYBR Green I (Marie et al., 1997) and large  
391 suspended particles were removed by filtration through 5  $\mu\text{m}$  pore-size filters (Sartorius) to  
392 avoid clogging of the flow cytometer. Flow sorting was performed using a BD FACSCalibur  
393 flow cytometer equipped with a cell sorter and a 15 mW argon ion laser exciting at 488 nm  
394 (Becton Dickinson, UK). Autoclaved Milli-Q water was used as sheath fluid. Cell sorting was  
395 done at a low flow rate of  $12 \pm 3 \mu\text{l min}^{-1}$  or a medium flow rate of  $35 \pm 5 \mu\text{l min}^{-1}$  with single  
396 cell sort mode to obtain highest purity. The event rate was adjusted with a fluorescence  
397 threshold and sorting was performed on a rate of approximately 25-250 particles  $\text{s}^{-1}$ . SYBR  
398 Green I stained cells were identified on scatter dot plots of green fluorescence (filter FL1  
399 530/30) versus 90° light scatter. Bacteriochlorophyll fluorescence was identified on scatter dot  
400 plots of red fluorescence (filter FL3 650LP) versus 90° light scatter. For subsequent  
401 measurements 25,000-100,000 cells were sorted and filtered onto 0.2  $\mu\text{m}$  polycarbonate filters  
402 (GTTP, Millipore). Collected cell batches on polycarbonate filters were directly transferred  
403 into 6 ml scintillation vials and mixed with 5 ml UltimaGold XR (Perkin Elmer) scintillation



404 cocktail. Radioactivity of sorted cell batches was measured in a liquid scintillation counter (Tri-  
405 Carb 2900, Perkin Elmer). The abundance of PSB and GSB in  $^{14}\text{C}$ -carbon assimilation  
406 experiments is given as relative percentage of gated cells identified as PSB/GSB out of all  
407 SYBR green-stained cells concurrently counted using flow cytometry.

408

#### 409 **Acknowledgements**

410 We thank Iva Soža, Klara Filek, Neven Cukrov and the scientists of IRB research station  
411 Martinska for support during sample collection. We are especially grateful to Jasmine S. Berg  
412 for determining reduced sulfur species concentrations, and to Cedric Garnier for providing us  
413 with the Hydrolab DS5 multiparameter water quality probe. Alastair Gardiner is acknowledged  
414 for language editing and Martina Hanusova for preparing the pigment extracts. Financial  
415 support was provided by the Max Planck Gesellschaft (MPG), and the Croatian Science  
416 Foundation through the BABAS project.

## 417 **References**

- 418 Abella, C., Montesinos, E., and Guerrero, R. (1980) Field studies on the competition between  
419 purple and green sulfur bacteria for available light (Lake Siso, Spain). In *Shallow Lakes*  
420 *Contributions to their Limnology*. Dokulil, H., Metz, H., and Jewson, D. (eds). Springer, pp.  
421 173-181.
- 422 Aziz, R.K., Bartels, D., Best, A.A., DeJongh, M., Disz, T., Edwards, R. A., et al. (2008) The  
423 RAST Server: rapid annotations using subsystems technology. *BMC Genomics* 9: 75.
- 424 Barešić, J., Horvatinčić, N., and Roller-Lutz, Z. (2011) Spatial and seasonal variations in the  
425 stable C isotope composition of dissolved inorganic carbon and in physico-chemical water  
426 parameters in the Plitvice Lakes system. *Isot Environ Healt S* 47: 316-329.
- 427 Bankevich, A., Nurk, S., Antipov, D., Gurevich, A.A., Dvorkin, M., Kulikov, A.S., et al. (2012)  
428 SPAdes: a new genome assembly algorithm and its applications to single-cell sequencing. *J*  
429 *Comput Biol* 19: 455-477.
- 430 Berg, J.S., Pjevac, P., Sommer, T., Buckner, C.R., Philippi, M., Hach, P.F., et al. (2018) Dark  
431 aerobic sulfide oxidation by anoxygenic phototrophs in anoxic waters. *Environ Microbiol.*  
432 <https://doi.org/10.1111/1462-2920.14543>
- 433 Brocks, J.J., Love, G.D., Summons, R.E., Knoll, A.H., Logan, G.A., and Bowden, S.A. (2005)  
434 Biomarker evidence for green and purple sulphur bacteria in a stratified Palaeoproterozoic sea.  
435 *Nature* 437: 866-870.
- 436 Bura-Nakić, E., Helz, G.R., Ciglencečki, I., and Čosović, B. (2009) Reduced sulfur species in a  
437 stratified seawater lake (Rogoznica Lake, Croatia); seasonal variations and argument for  
438 organic carriers of reactive sulfur. *Geochim Cosmochim Acta* 73: 3738-3751.
- 439 Camacho, A., and Vicente, E. (1998) Carbon photoassimilation by sharply stratified  
440 phototrophic communities at the chemocline of Lake Arcas (Spain). *FEMS Microbiol Ecol* 25:  
441 11-22.
- 442 Camacho, A., Erez, J., Chicote, A., Florín, M., Squires, M.M., Lehmann, C., and Backofen, R.  
443 (2001) Microbial microstratification, inorganic carbon photoassimilation and dark carbon  
444 fixation at the chemocline of the meromictic Lake Cadagno (Switzerland) and its relevance to  
445 the food web. *Aquat Sci* 63: 91-106.
- 446 Casamayor, E.O., García-Cantizano, J., Mas, J., and Pedrós-Alió, C. (2001) Microbial primary  
447 production in marine oxic/anoxic interfaces: main role of dark fixation in the Ebro River salt  
448 wedge estuary. *Mar Ecol Prog Ser* 215: 49-56.
- 449 Casamayor, E.O., Ferrera, I., Cristina, X., Borrego, C.M., and Gasol, J.M. (2007) Flow  
450 cytometric identification and enumeration of photosynthetic sulfur bacteria and potential for  
451 ecophysiological studies at the single-cell level. *Environ Microbiol* 9: 1969-1985.

- 452 Caumette, P., Baulaigue, R., and Matheron, R. (1988) Characterization of *Chromatium*  
453 *salexigens* sp. nov., a halophilic Chromatiaceae isolated from Mediterranean salinas. Syst Appl  
454 Microbiol, 10: 284-292.
- 455 Caumette, P., Imhoff, J.F., Süling, J., and Matheron, R. (1997) *Chromatium glycolicum* sp.  
456 nov., a moderately halophilic purple sulfur bacterium that uses glycolate as substrate. Arch  
457 Microbiol, 167: 11-18.
- 458 Chew, A.G., and Bryant, D.A. (2007) Chlorophyll biosynthesis in bacteria: the origins of  
459 structural and functional diversity. Annu Rev Microbiol 61: 113-129.
- 460 Cline, J.D. (1969) Spectrophotometric determination of hydrogen sulfide in natural waters.  
461 Anal Chem 21: 1005-1009.
- 462 Cohen, Y., Krumbein, W.E., and Shilo, M. (1977) Solar Lake (Sinai). 2. Distribution of  
463 photosynthetic microorganisms and primary production. Limnol Oceanogr 22: 609-620.
- 464 Cossarini, G., Lazzari, P., and Solidoro, C. (2015) Spatiotemporal variability of alkalinity in  
465 the Mediterranean Sea. Biogeosciences 12: 1647-1658.
- 466 Dyksma, S., Bischof, K., Fuchs, B.M., Hoffmann, K., Meier, D.V., Meyerdierks, A., et al.  
467 (2016) Ubiquitous *Gammaproteobacteria* dominate dark carbon fixation in coastal sediments.  
468 ISME J 10: 1939-1953.
- 469 Ferdelman, T.G., Church, T.M., and Luther, G.W. (1991) Sulfur enrichment of humic  
470 substances in a Delaware salt marsh sediment core. Geochim Cosmochim Acta 55: 979-988.
- 471 Florea, L.J., Dugan, C.R., and McKinney, C. (2016) 12. Geochemistry of cave pools connected  
472 to an alpine epikarst—Timpanogos Cave National Monument, Utah. Geol Soc Am Spec Pap  
473 516: 165-179.
- 474 Fontes, M.L.S., Suzuki, M.T., Cottrell, M.T., and Abreu, P.C. (2011) Primary production in a  
475 subtropical stratified coastal lagoon - contribution of anoxygenic phototrophic bacteria. Microb  
476 Ecol 61: 223-237.
- 477 García-Cantizano, J., Casamayor, E.O., Gasol, J.M., Guerrero, R., and Pedrós-Alió, C. (2005)  
478 Partitioning of CO<sub>2</sub> incorporation among planktonic microbial guilds and estimation of *in situ*  
479 specific growth rates. Microb Ecol 50: 230-241.
- 480 Gemayel, E., Hassoun, A.E.R., Benallal, M.A., Goyet, C., Rivaro, P., Abboud-Abi Saab, M.,  
481 et al. (2015) Climatological variations of total alkalinity and total dissolved inorganic carbon  
482 in the Mediterranean Sea surface waters. Earth Syst Dynam 6: 789-800.
- 483 Gorlenko, V. M. (1970) A new phototrophic green sulfur bacterium-- *Prosthecochloris*  
484 *aestuarii* nov. gen. nov. sp. Z Allg Mikrobiol 10: 147-149.

- 485 Gruber-Vodicka, H. R., Seah, B. K., and Pruesse, E. (2019) phyloFlash - Rapid SSU rRNA  
486 profiling and targeted assembly from metagenomes. bioRxiv, 521922.
- 487 Guerrero, R., Montesinos, E., Pedrós-Alió, C., Esteve, I., Mas, J., Van Gemerden, H., et al.  
488 (1985) Phototrophic sulfur bacteria in two Spanish lakes: vertical distribution and limiting  
489 factors. *Limnol Oceanogr* 30: 919-931.
- 490 Imhoff, J.F. (2006a) The *Chromatiaceae*. In *Prokaryotes* 6. Dworkin, M., Falkow, S.,  
491 Rosenberg, E., Schleifer, K.-H., Stackebrandt, E. (eds). Springer, pp. 846-873.
- 492 Imhoff, J.F. (2006b) The family *Ectothiorhodospiraceae*, In *Prokaryotes* 6. Dworkin, M.,  
493 Falkow, S., Rosenberg, E., Schleifer, K.-H., Stackebrandt, E. (eds). Springer, pp. 874-886.
- 494 Jørgensen, B.B., Kuenen, J.G., and Cohen, Y. (1979) Microbial transformations of sulfur  
495 compounds in a stratified lake (Solar Lake, Sinai). *Limnol Oceanogr* 24: 799-822.
- 496 Kamyshny Jr, A., Zerkle, A.L., Mansaray, Z.F., Ciglencčki, I., Bura-Nakić, E., Farquhar, J.,  
497 and Ferdelman, T.G. (2011) Biogeochemical sulfur cycling in the water column of a shallow  
498 stratified sea-water lake: speciation and quadruple sulfur isotope composition. *Mar Chem* 127:  
499 144-154.
- 500 Kumar, P.A., Srinivas, T.N.R., Sasikala, C., and Ramana, C.V. (2007) *Halochromatium*  
501 *roseum* sp. nov., a non-motile phototrophic gammaproteobacterium with gas vesicles, and  
502 emended description of the genus *Halochromatium*. *Int J Syst Evol Micr* 57: 2110-2113.
- 503 Letunic, I., and Bork, P. (2016) Interactive tree of life (iTOL) v3: an online tool for the display  
504 and annotation of phylogenetic and other trees. *Nuc Acid Res*, 44: W242-W245.
- 505 Lipizer, M., Partescano, E., Rabitti, A., Giorgetti, A., and Crise, A. (2014) Qualified  
506 temperature, salinity and dissolved oxygen climatologies in a changing Adriatic Sea. *Ocean*  
507 *Science* 10: 771-797.
- 508 Llorens-Marès, T., Yooseph, S., Goll, J., Hoffman, J., Vila-Costa, M., Borrego, C.M., Dupont,  
509 C.L., and Casamayor, E.O. (2015) Connecting biodiversity and potential functional role in  
510 modern euxinic environments by microbial metagenomics. *ISME J* 9: 1648-1661.
- 511 Luedin, S.M., Storelli, N., Danza, F., Roman, S., Wittwer, M., Pothier, J. F., and Tonolla, M.  
512 (2019) Mixotrophic Growth under Micro-oxic Conditions in the Purple Sulfur Bacterium  
513 “*Thiodictyon syntrophicum* “. *Front Microbiol* 10: 384.
- 514 Malešević, N., Ciglencčki, I., Bura-Nakić, E., Carić, M., Dupčić, I., Hrustić, E., Viličić, D.,  
515 and Ljubešić, Z. (2015) Diatoms in an extreme euxinic environment (Rogoznica Lake, eastern  
516 Adriatic coast). *Acta Bot Croat* 74: 333-343.

- 517 Marie, D., Partensky, F., Jacquet, S., and Vaultot, D. (1997) Enumeration and cell cycle analysis  
518 of natural populations of marine picoplankton by flow cytometry using the nucleic acid stain  
519 SYBR Green I. *Appl Environ Microbiol* 63: 186-193.
- 520 Marschall, E., Jogler, M., Hessge, U., and Overmann, J. (2010) Large-scale distribution and  
521 activity patterns of an extremely low-light-adapted population of green sulfur bacteria in the  
522 Black Sea. *Environ Microbiol* 12: 1348-1362.
- 523 Mas, J., and van Gemerden, H. (1995) Storage products in purple and green sulfur bacteria. In  
524 Anoxygenic photosynthetic bacteria. Blankenship, R.E., Madigan, M.T., and Bauer, C.E. (eds).  
525 Springer, pp. 973-990.
- 526 Massana, R., Murray, A.E., Preston, C.M., and DeLong, E.F. (1997) Vertical distribution and  
527 phylogenetic characterization of marine planktonic archaea in the Santa Barbara Channel. *Appl*  
528 *Environ Microbiol* 63:50-56.
- 529 Morana, C., Roland, F.A., Crowe, S.A., Llíros, M., Borges, A.V., Darchambeau, F., and  
530 Bouillon, S. (2016) Chemoautotrophy and anoxygenic photosynthesis within the water column  
531 of a large meromictic tropical lake (Lake Kivu, East Africa). *Limnol Oceanogr* 61: 1424-1437.
- 532 Musat, N., Halm, H., Winterholler, B., Hoppe, P., Peduzzi, S., Hillion, F., et al. (2008) A single-  
533 cell view on the ecophysiology of anaerobic phototrophic bacteria. *Proc Nat Acad Sci USA*  
534 105: 17861-17866.
- 535 Mußmann, M., Pjevac, P., Krüger, K., and Dykma, S. (2017) Genomic repertoire of the  
536 Woeseiaceae/JTB255, cosmopolitan and abundant core members of microbial communities in  
537 marine sediments. *ISME J* 11: 1276.
- 538 Overmann J., Cypionka H., and Pfennig N. (1992) An extremely low-light-adapted  
539 phototrophic sulfur bacterium from the Black Sea. *Limnol Oceanogr* 37: 150-155.
- 540 Overmann, J. (2006) The Family *Chlorobiaceae*, In *Prokaryotes* 6. Dworkin, M., Falkow, S.,  
541 Rosenberg, E., Schleifer, K.-H., Stackebrandt, E. (eds). Springer, pp. 359-378.
- 542 Overmann, J., and Garcia-Pichel, F. (2013) The phototrophic way of life. In *Prokaryotes*.  
543 Rosenberg, E., DeLong, E.F., Lory, S., Stackebrandt, E., and Thompson, F. (eds). Springer, pp.  
544 203-257.
- 545 Parks, D.H., Imelfort, M., Skennerton, C.T., Hugenholtz, P., and Tyson, G.W. (2015) CheckM:  
546 assessing the quality of microbial genomes recovered from isolates, single cells, and  
547 metagenomes. *Genome Res*, gr-186072.
- 548 Pjevac, P., Korlević, M., Berg, J.S., Bura-Nakić, E., Ciglencečki, I., Amann, R., and Orlić, S.  
549 (2015) Community shift from phototrophic to chemotrophic sulfide oxidation following anoxic  
550 holomixis in a stratified seawater lake. *Appl Environ Microbiol* 81: 298-308.

- 551 Pruesse, E., Peplies, J. and Glöckner, F.O. (2012) SINA: accurate high-throughput multiple  
552 sequence alignment of ribosomal RNA genes. *Bioinformatics* 28: 1823-1829.
- 553 Rodriguez-R, L.M., Gunturu, S., Harvey, W.T., Rosselló-Mora, R., Tiedje, J.M., Cole, J.R.,  
554 and Konstantinidis, K. T. (2018). The Microbial Genomes Atlas (MiGA) webserver: taxonomic  
555 and gene diversity analysis of Archaea and Bacteria at the whole genome level. *Nuc Acid Res*  
556 46: W282-W288.
- 557 Scheer, H. (2006) An Overview of Chlorophylls and Bacteriochlorophylls: Biochemistry,  
558 Biophysics, Functions and Applications. In *Chlorophylls and Bacteriochlorophylls*. Grimm,  
559 B., Porra, R.J., Rüdiger, W., and Scheer, H. (eds). Springer, pp. 1-26
- 560 Stomp, M., Huisman, J., Stal, L.J., and Matthijs, H.C. (2007) Colorful niches of phototrophic  
561 microorganisms shaped by vibrations of the water molecule. *ISME J* 1: 271-282.
- 562 Storelli, N., Peduzzi, S., Saad, M.M., Frigaard, N.U., Perret, X., and Tonolla, M. (2013) CO<sub>2</sub>  
563 assimilation in the chemocline of Lake Cadagno is dominated by a few types of phototrophic  
564 purple sulfur bacteria. *FEMS Microbiol Ecol* 84: 421-432.
- 565 Strous, M., Kraft, B., Bisdorf, R., and Tegetmeyer, H. (2012). The binning of metagenomic  
566 contigs for microbial physiology of mixed cultures. *Front Microbiol* 3: 410.
- 567 Trifinopoulos, J., Nguyen, L.T., von Haeseler, A., and Minh, B.Q. (2016) W-IQ-TREE: a fast  
568 online phylogenetic tool for maximum likelihood analysis. *Nuc Acid Res*, 44: W232-W235.
- 569 Vila-Costa, M., Simó, R., Harada, H., Gasol, J.M., Slezak, D., and Kiene, R.P. (2006)  
570 Dimethylsulfoniopropionate uptake by marine phytoplankton. *Science* 314: 652-654.
- 571 Zimmermann, M., Escrig, S., Hübschmann, T., Kirf, M.K., Brand, A., Inglis, R.F., et al. (2015)  
572 Phenotypic heterogeneity in metabolic traits among single cells of a rare bacterial species in its  
573 natural environment quantified with a combination of flow cell sorting and NanoSIMS. *Front*  
574 *Microbiol* 6: 243.
- 575 Zopfi, J., Ferdelman, T.G., and Fossing, H. (2004) Distribution and fate of sulfur intermediates  
576 - sulfite, tetrathionate, thiosulfate, and elemental sulfur - in marine sediments. *Geol Soc Am*  
577 *Spec P* 379: 97-116.
- 578 Zubkov, M.V., Fuchs, B.M., Tarran, G.A., Burkill, P.H., and Amann, R. (2003) High rate of  
579 uptake of organic nitrogen compounds by *Prochlorococcus* cyanobacteria as a key to their  
580 dominance in oligotrophic oceanic waters. *Appl Environ Microbiol* 69: 1299-1304.
- 581 Žic, V., Carić, M., and Ciglencčki, I. (2013) The impact of natural water column mixing on  
582 iodine and nutrient speciation in a eutrophic anchialine pond (Rogoznica Lake, Croatia). *Estuar*  
583 *Coast Shelf Sci* 133: 260-272.

584 **Tables and figures**

585 **Table 1:** Genomic features of recovered metagenome assembled genomes (MAGs) related to  
586 anoxygenic phototrophs.

| <b>MAG</b>                                    | <b>Contigs</b> | <b>CDS<sup>1</sup></b> | <b>Genome size [Mb]</b> | <b>GC content</b> | <b>Completeness</b> | <b>Contamination</b> |
|-----------------------------------------------|----------------|------------------------|-------------------------|-------------------|---------------------|----------------------|
| <i>Halochromatium</i> sp. (A10)               | 43             | 3,913                  | 4.19                    | 60.8%             | 82.9%               | 1.8%                 |
| <i>Prosthecochloris aestuarii</i> spp. (B10)  | 32             | 2,070                  | 2.26                    | 50.1%             | 92.8%               | 0.9%                 |
| <i>Chlorobium phaeobacteroides</i> spp. (C10) | 40             | 2,009                  | 2.13                    | 44.1%             | 91.9%               | 0%                   |

587 <sup>1</sup>coding domain sequences

588

589

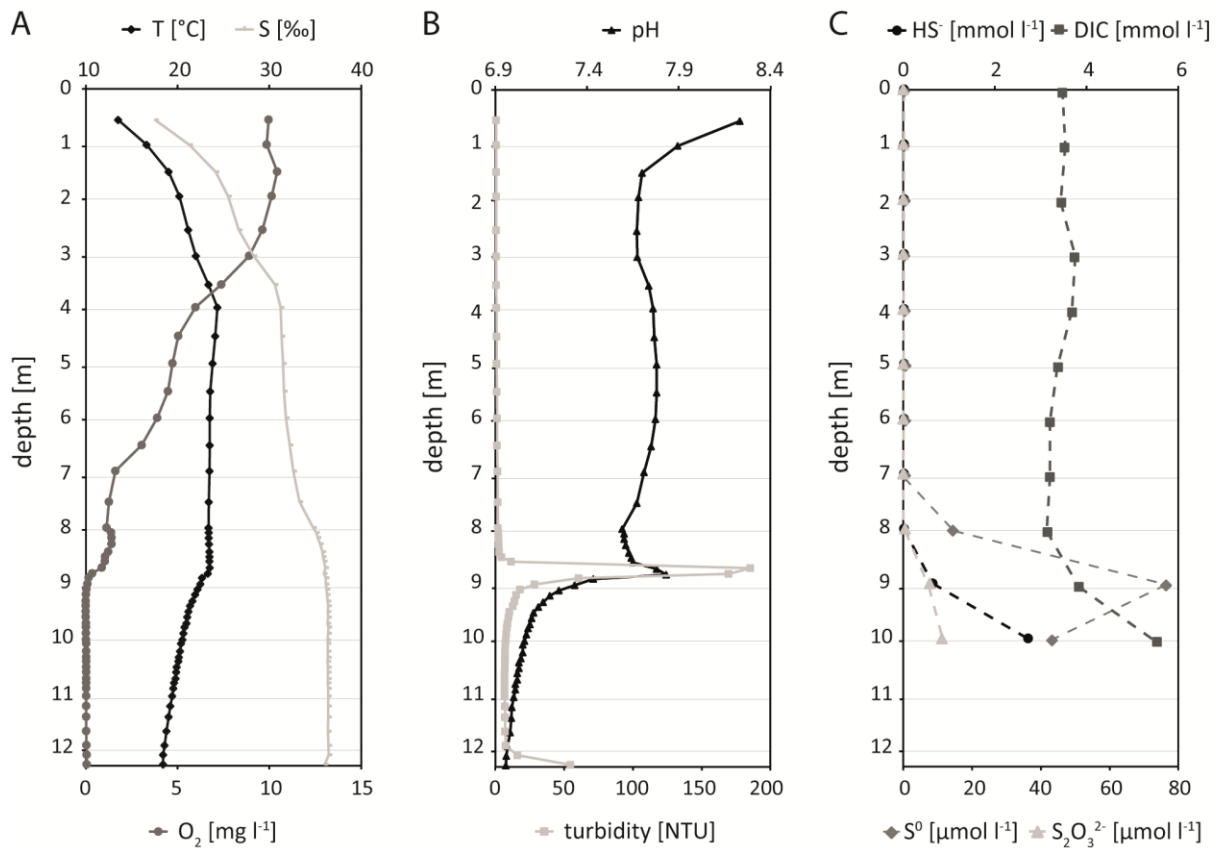

590

591 **Figure 1.**

592 Hydrographical profile and reduced sulfur speciation in a depth profile of Lake Rogoznica  
593 collected in April 2015. From left to right: **A** Temperature (T) (°C), salinity (S) (‰) (top x  
594 axis), and dissolved oxygen (O<sub>2</sub>) concentration (mg l<sup>-1</sup>) (bottom x axis) profiles. **B** pH (top x  
595 axis) and turbidity (NTU) (bottom x axis) profiles. **C** Sulfide (HS<sup>-</sup>) concentration (mmol l<sup>-1</sup>),  
596 dissolved inorganic carbon (DIC) concentration (mmol l<sup>-1</sup>) (top x axis), elemental sulfur (S<sup>0</sup>)  
597 concentration (μmol l<sup>-1</sup>), and thiosulfate (S<sub>2</sub>O<sub>3</sub><sup>2-</sup>) concentration (μmol l<sup>-1</sup>) (bottom x axis)  
598 profiles.

599

600



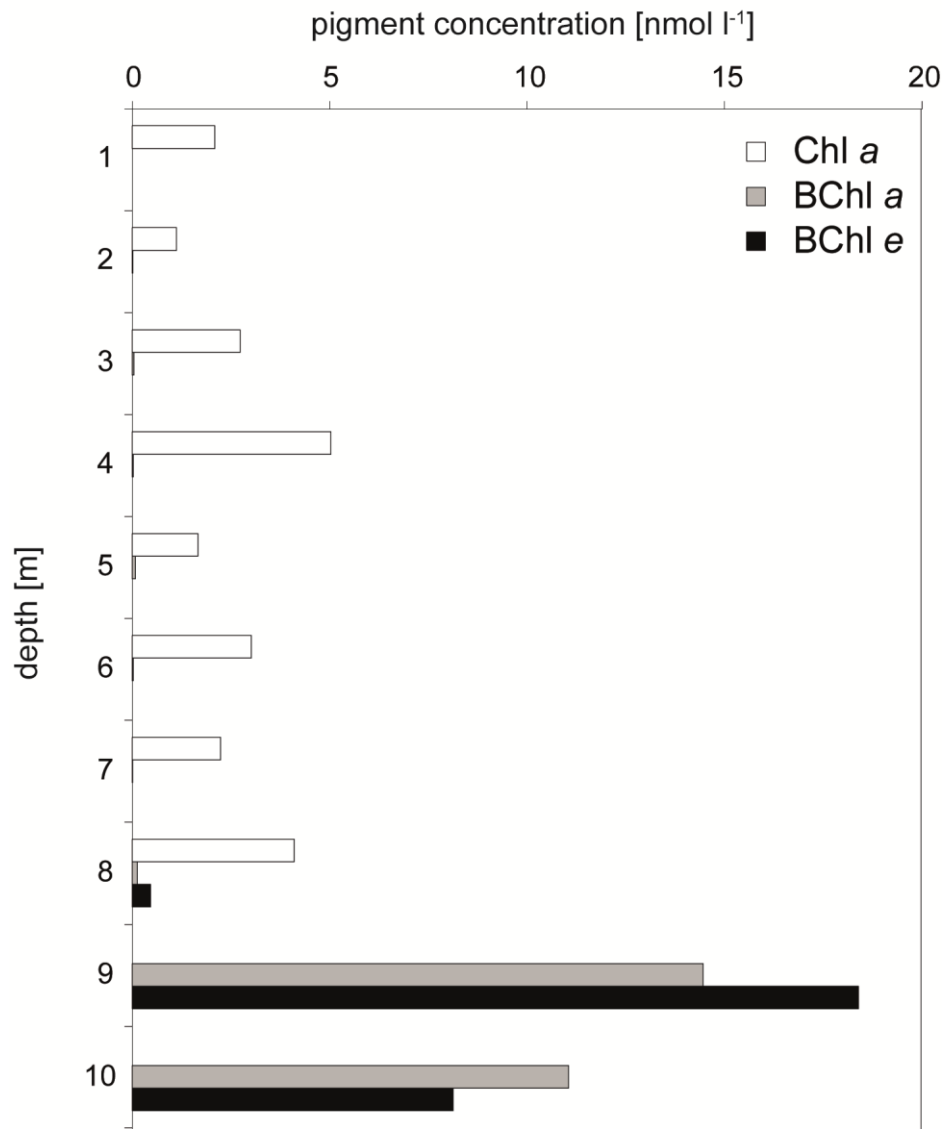

601

602 **Figure 2.**

603 Depth profile of Chlorophyll *a* (Chl *a*), Bacteriochlorophyll *a* (BChl *a*), and

604 Bacteriochlorophyll *e* (BChl *e*) concentrations (nmol l<sup>-1</sup>) in Lake Rogoznica.

605

606

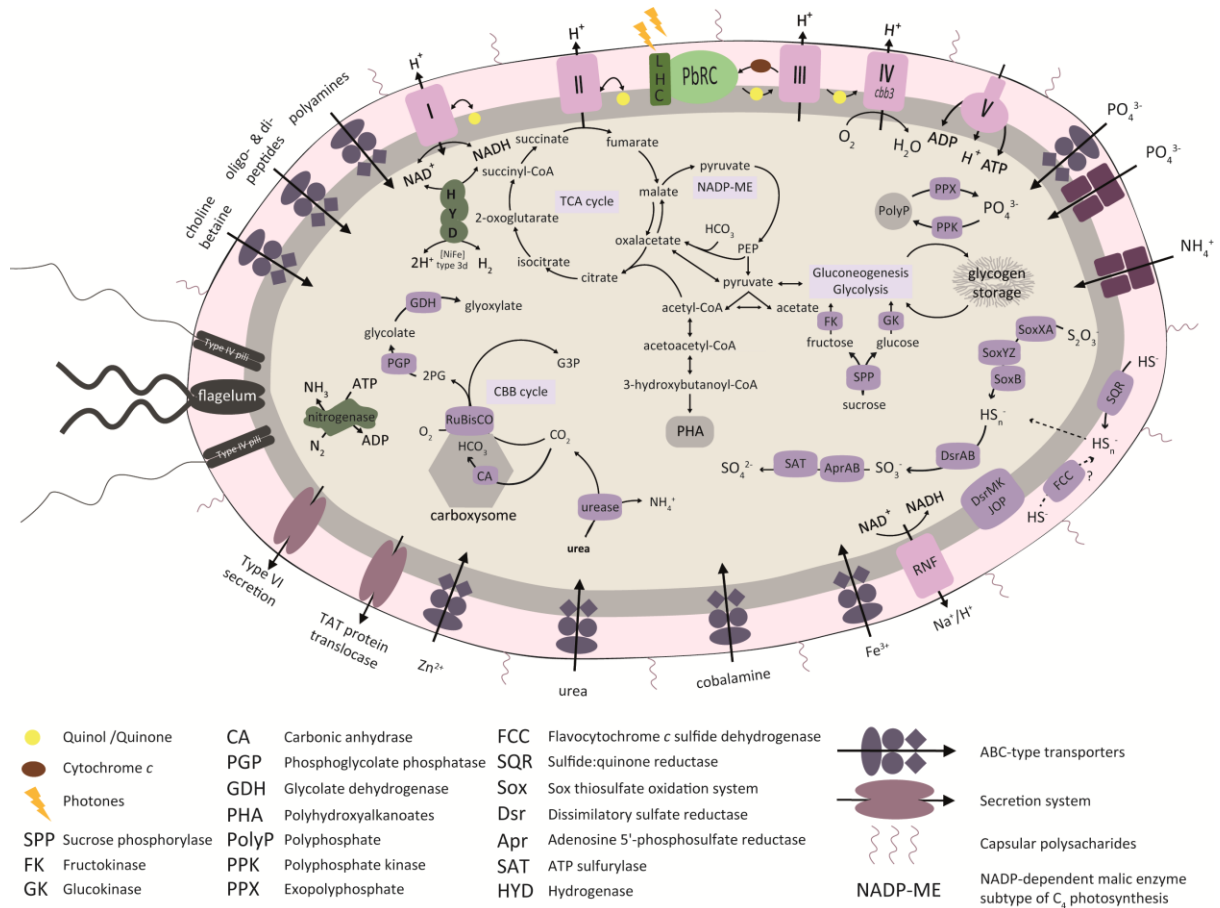

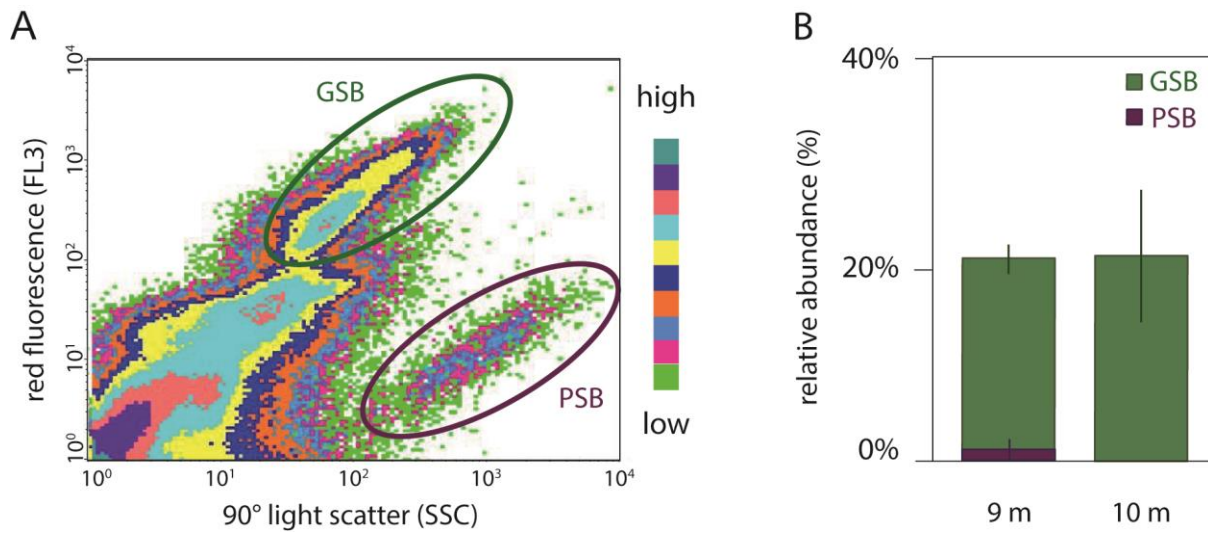

616

617 **Figure 4.**

618 **A** An exemplary sort plot of red fluorescence (FL3; y-axis) versus 90° light scatter (SSC; x-  
619 axis) recorded during FACS of a <sup>14</sup>C-bicarbonate incubated chemocline (9 m) sample. The  
620 populations identified as GSB (green circle) and PSB (red circle) are highlighted. The color  
621 scale bar indicates event frequencies. **B** Relative abundance of sorted GSB (green) and PSB  
622 (purple) populations in the chemocline (9 m) and hypolimnion (10 m) samples.

623

624

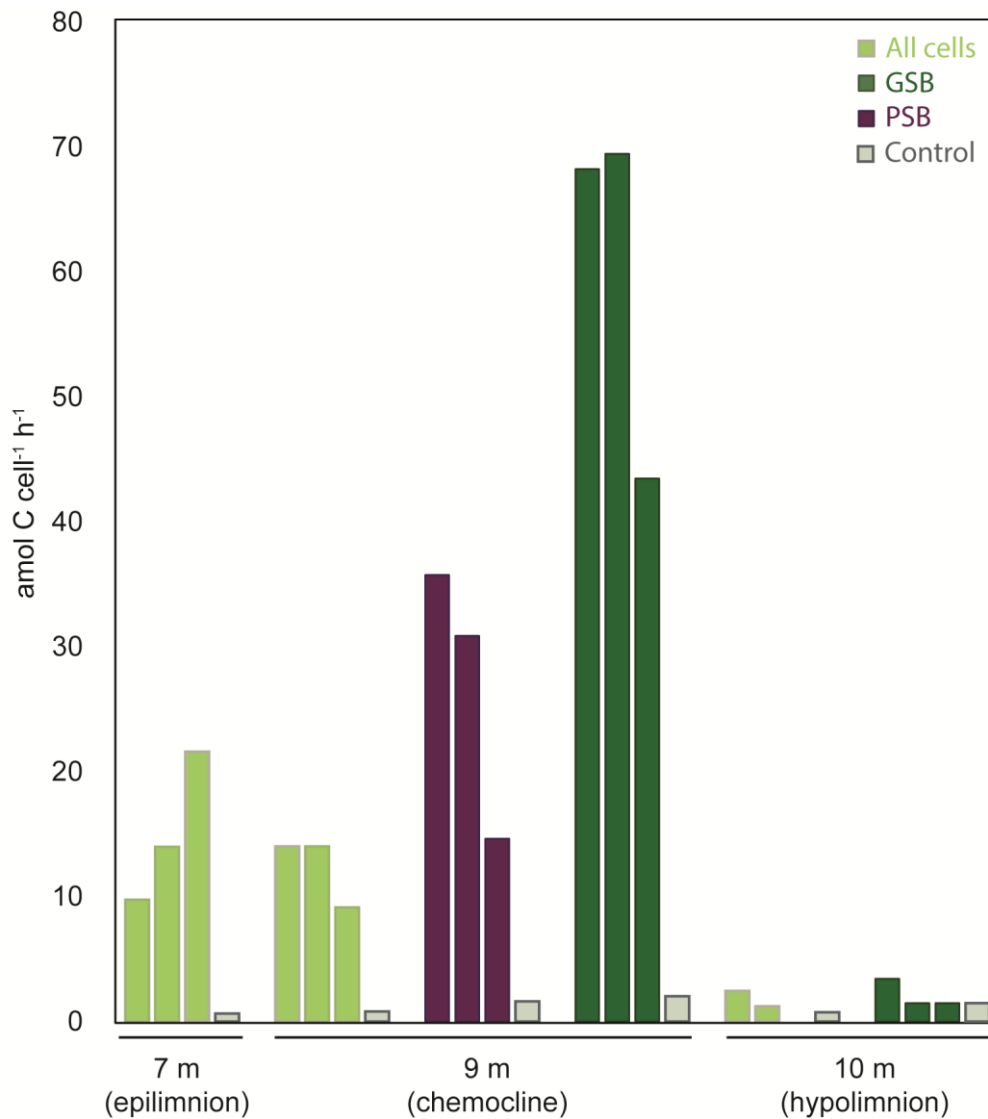

625

626 **Figure 5.**

627 Averaged cell specific carbon assimilation rates (in  $\text{amol C cell}^{-1} \text{ h}^{-1}$ ) plotted separately for

628 each sorted population from epilimnion (7 m), chemocline (9 m) and hypolimnion (10 m)

629 samples. Sorts of all cells (100,000 cells/sort) are shown in light green, sorts of GSB (50,000

630 cells/sort) are shown in dark green, and sorts of PSB (25,000 cells/sort) are shown in purple.

631 Averaged cell specific carbon assimilation rates (in  $\text{amol C cell}^{-1} \text{ h}^{-1}$ ) for sorts of all cells

632 (100,000 cells/sort) in dead controls are depicted in gray for each depth.
